# Supplementary material for: Rapid naked eye sensing of fluoride by calix[4]arene upper rim tetra functionalized pentafluorophenyl hydrazone
Source: Royal Society of Chemistry journal article supplement (doi:10.1039/d3nj02254d), 2023-01-01
Supplement: d3nj02254d1.pdf [file d3nj02254d1.pdf]

## Supporting Information

### Rapid naked eye sensing of fluoride using upper rim functionalized pentafluorophenyl hydrazone derivative of calix[4]arene

Anita Nehra,<sup>1,2</sup> Apoorva Malik,<sup>1</sup> Pragati R Sharma,<sup>1</sup> Sateesh Bandaru<sup>3\*</sup> and Rakesh K Sharma<sup>1\*</sup>

<sup>1</sup> Department of Chemistry, Indian Institute of Technology Jodhpur, Karwar-342030, Rajasthan, India, rks@iitj.ac.in, <https://rks639.wixsite.com/rksgroup>. <sup>2</sup> Department of Chemistry, JECRC University, Sitapura Extension, Jaipur-303905 <sup>3</sup>Institute of Advanced Magnetic Materials, College of Materials and Environmental Engineering, Hangzhou Dianzi University, Hangzhou 310012, PR China; Email: sbandru@hdu.edu.cn

| <b>S. No.</b> | <b>Title</b>                                                 | <b>Page No.</b> |
|---------------|--------------------------------------------------------------|-----------------|
| S1.           | General Information                                          | 2               |
| S2.           | Synthesis and characterization of P <sub>2</sub>             | 2               |
| S3.           | Synthesis and characterization of P <sub>3</sub>             | 2               |
| S4.           | Characterization data of <b>R</b>                            | 3               |
| S5.           | Visual detection                                             | 4               |
| S6            | Synthesis and characterization of control molecule, <b>S</b> | 6               |
| S7            | Visual experiment of <b>S</b> with fluoride                  | 6               |
| S8            | Absorption studies                                           | 7               |
| S9            | NMR data                                                     | 7               |
| S10           | ESI MS studies                                               | 5               |
| S11           | Computational studies                                        | 7               |
| S12.          | Gaussian reference                                           | 7               |
| S13           | Structural coordinates                                       | 7               |

### **S1: General Information:**

All solvents were purchased from Qualigens. Calix[4]arene was procured from Chemfill. Pentafluoro phenylhy-drazine and tetrabutylammonium (TBA) salts of anions, were purchased from Alfa Aesar. All the chemicals were used without further purification. NMR experiments were performed on a Bruker 500 MHz spectrometer. Agilent technologies model G6564 QTOF instrument using the electrospray ionization method was used for mass spectral analysis. Fourier transform infrared spectra were recorded by the KBr pellet method using Bruker Vertex 70V spectro-photometer. Absorption studies were done using HPLC grade solvent on Varian Cary 4000. The concentration of R was kept constant at 10  $\mu$ M [100  $\mu$ L of dimethyl sulfoxide was used for dissolving R in acetonitrile, while the concentrations of the anion were varied from 10 to 500  $\mu$ M.

### **S2 Synthesis and characterization of P<sub>2</sub>:**

A slurry of calix[4]arene, P<sub>1</sub> (3 g, 4.629 mmol), phenol 2.25 ml and AlCl<sub>3</sub> (3.258 g, 24.4 mmol) was stirred in 100 ml of toluene at 50 °C for 1hr in inert atmosphere. Then the reaction mixture was poured into a 200 ml of cold 0.2 N HCl solution. Toluene layer was collected and washed with water 2 times followed by drying over anhydrous Na<sub>2</sub>SO<sub>4</sub>. Then the solution was evaporated and the residue was treated with methanol to obtain product as precipitate. Pure product P<sub>2</sub> was obtained by recrystallization of the crude from CHCl<sub>3</sub> and MeOH. <sup>1</sup>H NMR (500 MHz; CDCl<sub>3</sub>):  $\delta$  10.2 (s, 4H, ArOH); 7.05 (d, 8H, ArH), 6.71 (t, 4H, ArH), 4.25 (br, 4H ArCH<sub>2</sub>), 3.55 (br, 4H ArCH<sub>2</sub>) as given in Figure S01.

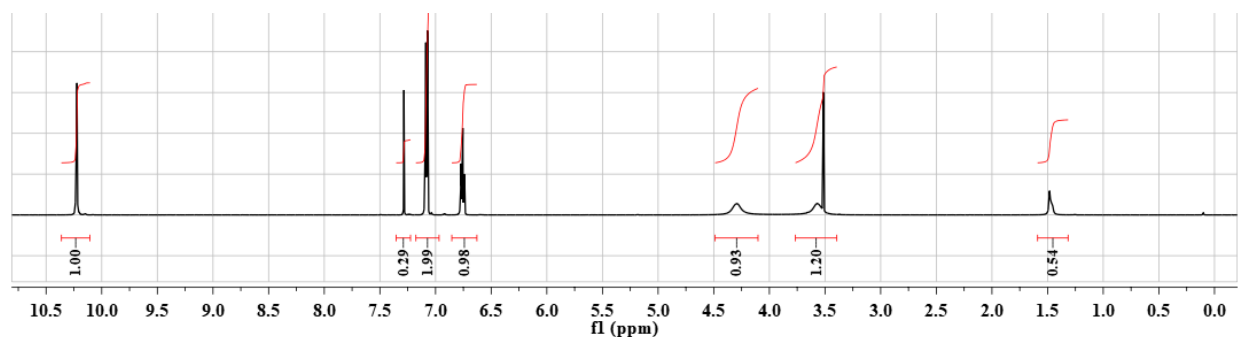

**Figure S01** <sup>1</sup>H NMR spectrum of P<sub>2</sub> in CDCl<sub>3</sub>.

### **S3 Synthesis and characterization of P<sub>3</sub>:**

A suspension of hexamethylene tetramine, HMTA (6 g, 42.8 mmol) and de-alkylated calix[4]arene, P<sub>2</sub> (0.5 g, 1.2 mmol) in 40 ml of trifluoroacetic acid was refluxed for 24 h. After cooling, the reaction mixture was poured into 1 N HCl (100 ml) solution and then stirred with dichloromethane (75 ml) for 6 h. Then the organic layer was separated and washed with water (2  $\times$  50 ml) and the organic layer was dried over Na<sub>2</sub>SO<sub>4</sub> and the solvent was evaporated in vacuum. Yield: 90%. <sup>1</sup>H NMR (500 MHz; DMSO-d<sub>6</sub>):  $\delta$  9.6 (s, 4H, ArCHO), 7.65 (s, 8H, ArH) as shown in Figure S02.

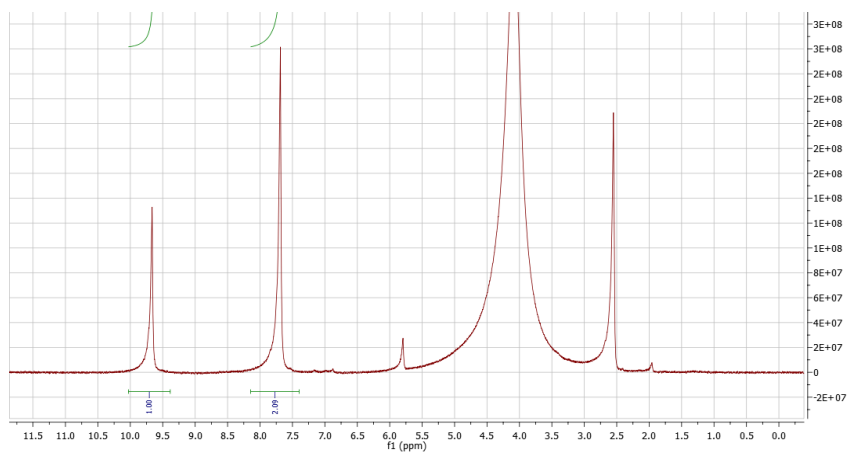

**Figure S02**  $^1\text{H}$  NMR spectrum of  $\text{P}_3$  in  $\text{DMSO-d}_6$ .

### **S4 Characterization data of R:**

The synthesis method and characterization data are given in the experimental section of the main manuscript. The  $^1\text{H}$ ,  $^{13}\text{C}$  NMR, HRMS and FT-IR are given below.

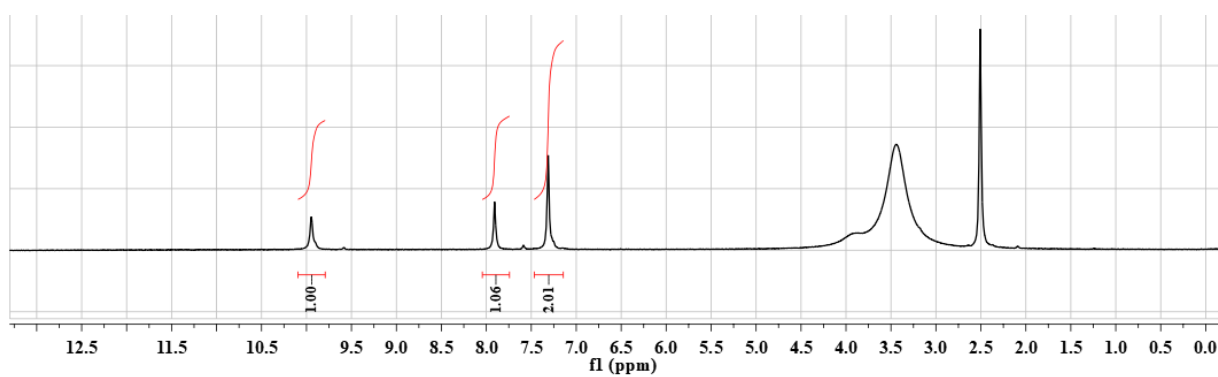

**Figure S03**  $^1\text{H}$  NMR spectrum of  $\text{R}$  in  $\text{DMSO-d}_6$ .

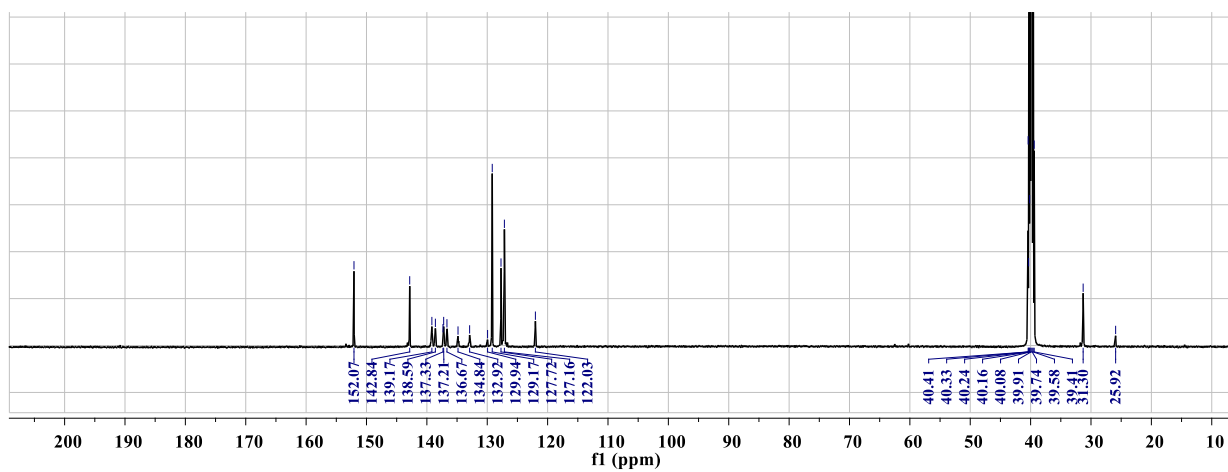

**Figure S04**  $^{13}\text{C}$  NMR spectrum of  $\text{R}$  in  $\text{DMSO-d}_6$ .

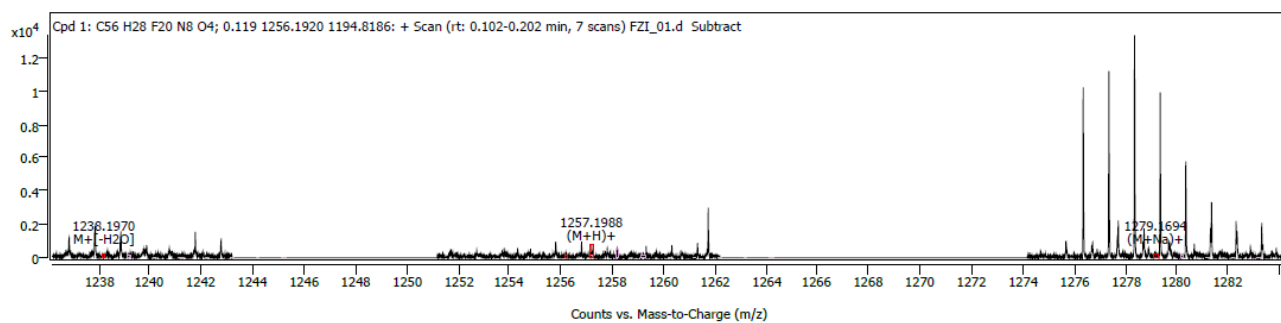

Spectrum Peaks

| m/z       | m/z (Calc) | Diff (ppm) | Abund | Height % | Height % (Calc) | Ion Species           | Z |
|-----------|------------|------------|-------|----------|-----------------|-----------------------|---|
| 1238.1970 | 1238.1803  | 13.47      | 259   | 100.00   | 100.00          | M+[-H <sub>2</sub> O] | 1 |
| 1256.1855 | 1256.1909  | -4.30      | 127   | 100.00   | 100.00          | M+                    | 1 |
| 1257.1988 | 1257.1987  | 0.06       | 808   | 100.00   | 100.00          | (M+H) <sup>+</sup>    | 1 |
| 1279.1694 | 1279.1806  | -8.81      | 251   | 100.00   | 100.00          | (M+Na) <sup>+</sup>   | 1 |

Figure S05 ESI-HRMS of R.

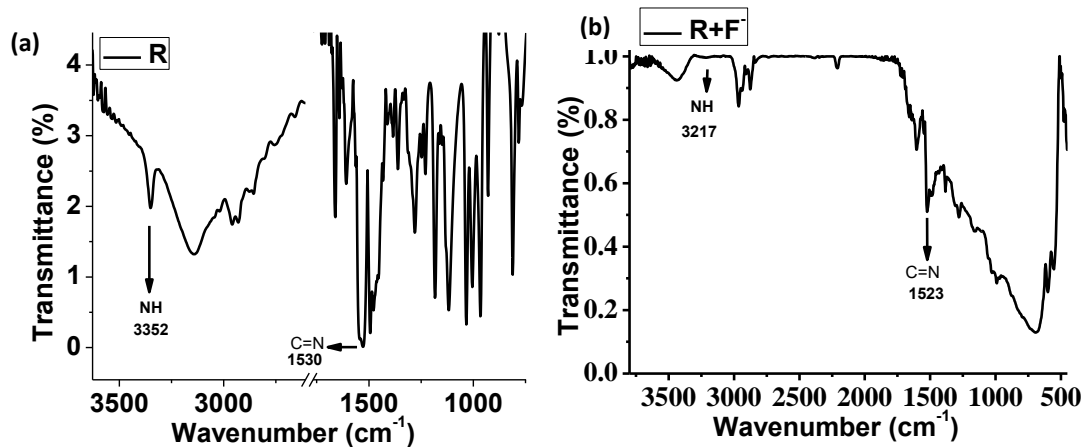

Figure S06 FTIR spectrum of (a) R and (b) R+F<sup>-</sup> (KBr pellet).

**S5 Visual detection:**

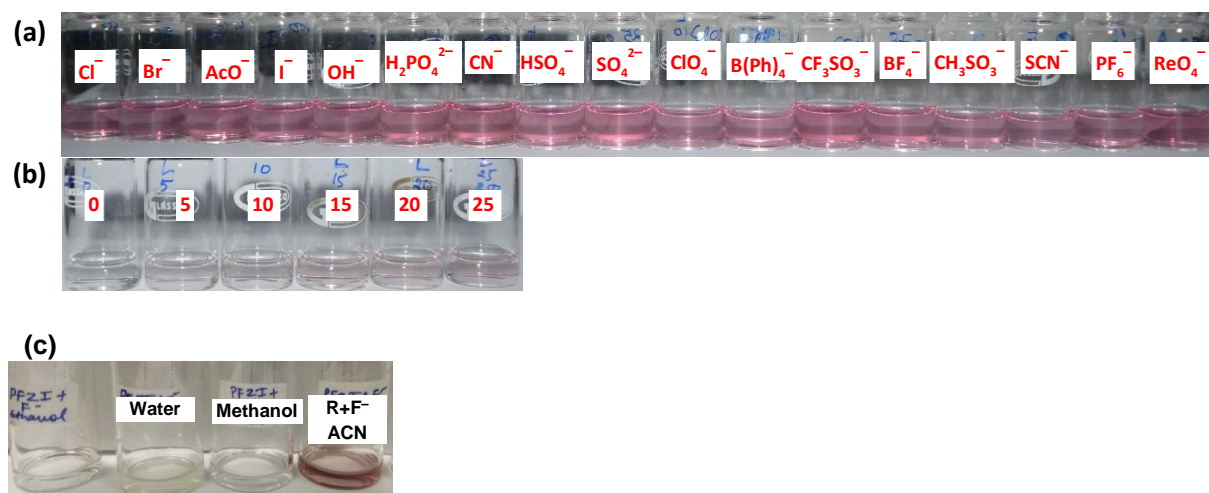

**Figure S07** (a) Ion interference study (b) Visual detection of fluoride with variable concentration of the R (5 to 25  $\mu$ L). (c) R+F<sup>-</sup> in different polar solvents.

### S6 Synthesis and characterization of control molecule, S

4.09 mmol of 4-hydroxy benzaldehyde was dissolved in 20 mL methanol and 4.91 mmol of pentafluoro phenylhydrazine was added to the above solution, the color was changed from yellow to brown immediately. The reaction mixture was stirred at room temperature for 24 h to make sure completion of reaction. <sup>1</sup>H NMR (CDCl<sub>3</sub>)  $\delta$  7.78 (s, 1H, imine CH),  $\delta$  7.5 (d, 2H, Ph-CH),  $\delta$  6.85 (d, 2H, Ph-CH),  $\delta$  6.85 (s, 1H, Ph-OH) and  $\delta$  5.1 (s, 1H, NH).

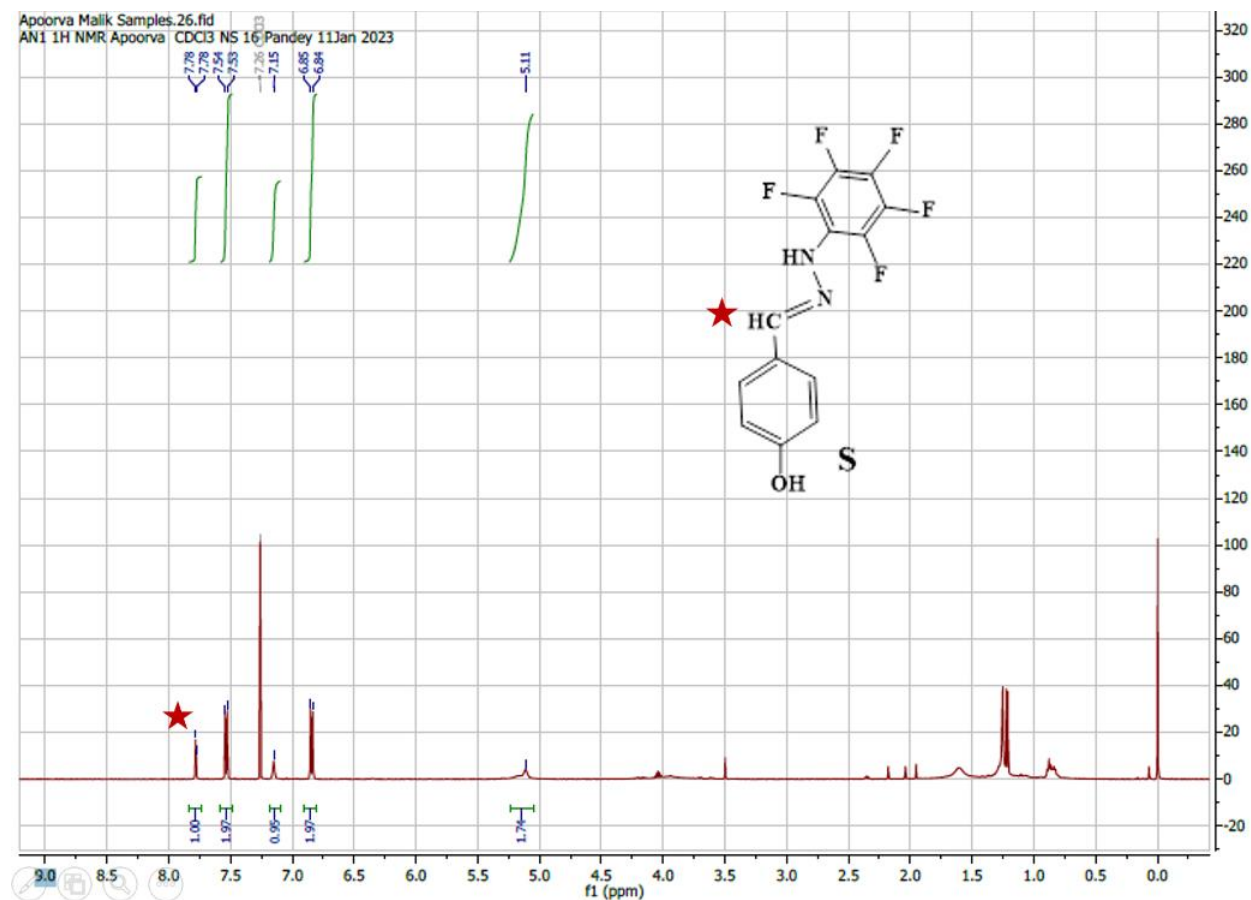

**Figure S08** <sup>1</sup>H NMR spectrum of single armed molecule, S in CDCl<sub>3</sub>.

### S7 Visual experiment of S with fluoride

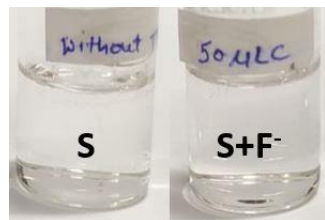

**Figure S09** Control molecule, S and S + TBAF in acetonitrile.

## S8 Absorption studies

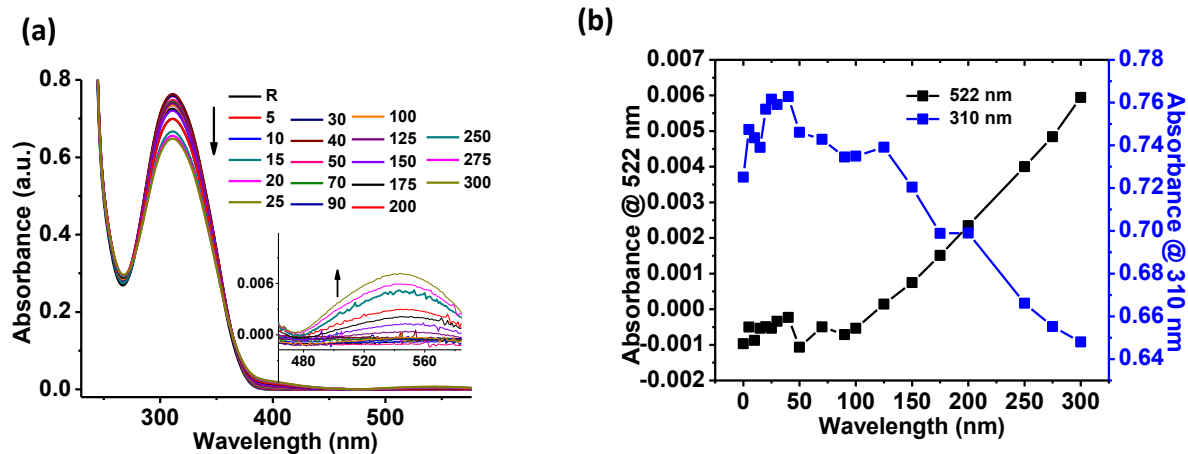

**Figure S10** (a) Absorption spectra obtained from the titration of R with variable concentrations of fluoride in acetonitrile. (b) The data plotted for the band at 310 and 522 nm for the same titration.

## S9 NMR data

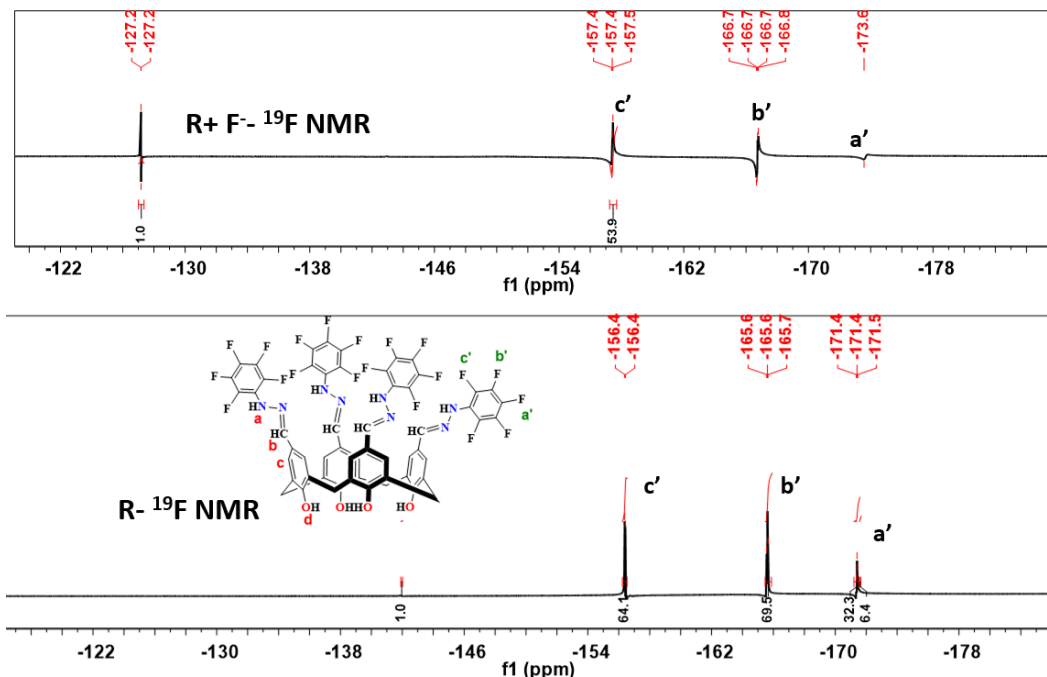

**Figure S11**  $^{19}\text{F}$  NMR spectrum of R and R+F $^{-}$ .

## S10 ESI MS of R+F $^{-}$ :

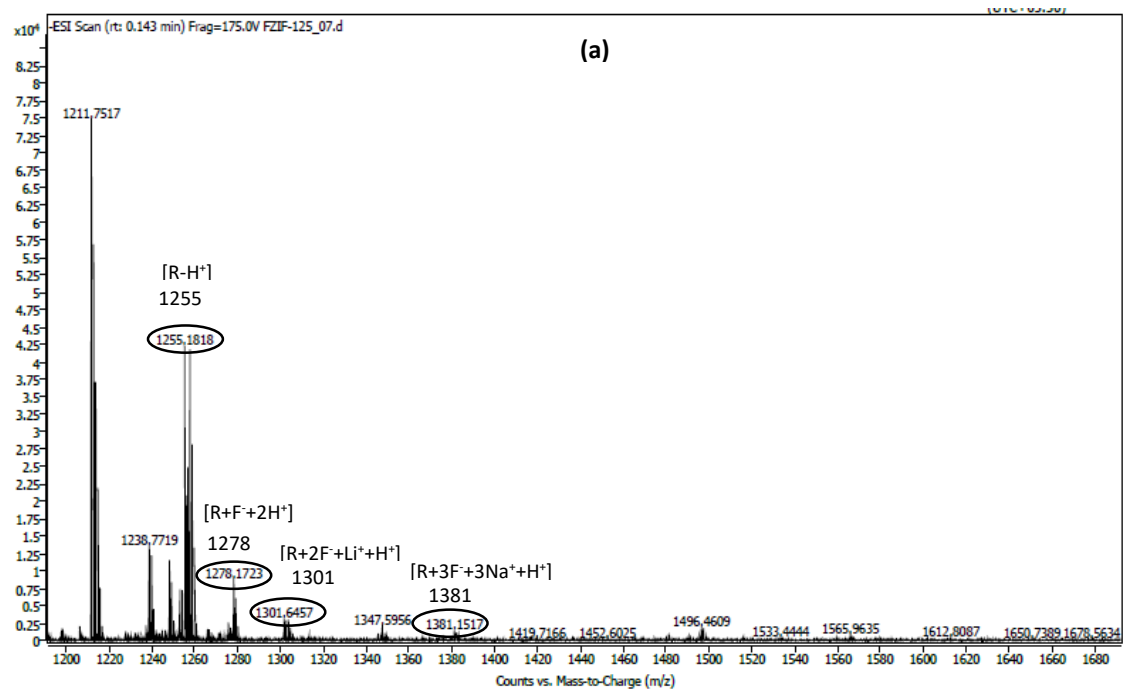

**Figure S12** ESI spectrum of (a) R + 5 equiv.  $F^-$ .

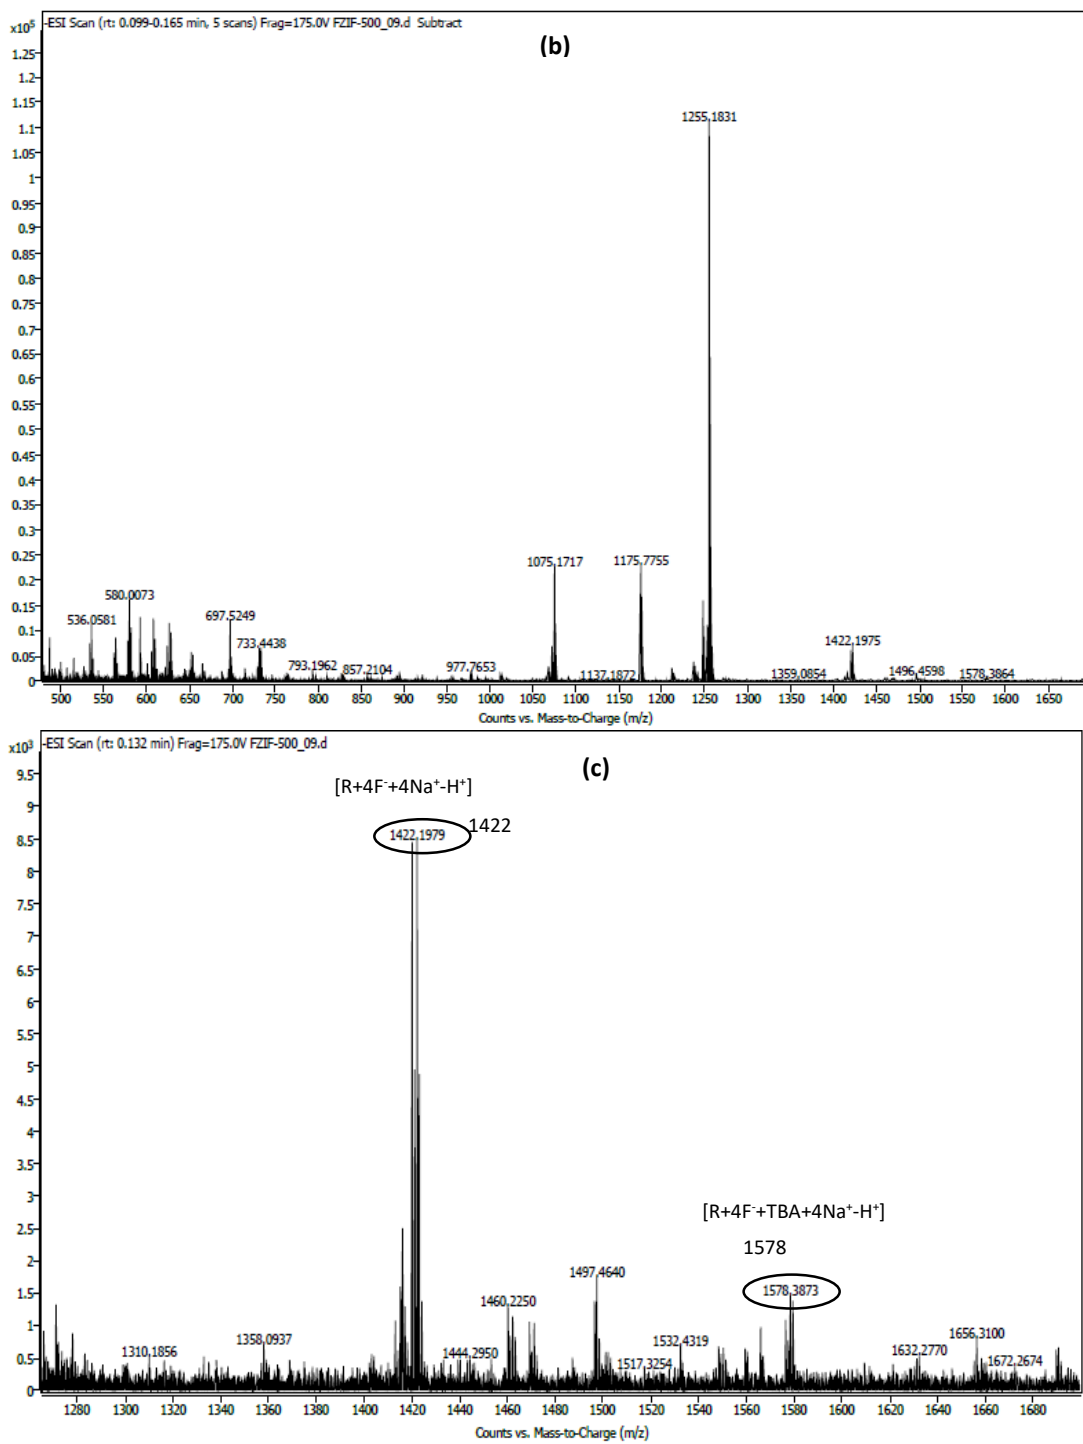

**Figure S13** ESI spectrum of (b) R + 10 equiv. F<sup>-</sup> (c) same as (b) with zoomed area.



**S11 Computational studies:** DFT studies were extended to other two anions,  $\text{OH}^-$  and  $\text{CN}^-$  that caused increase in the absorbance of R at 340 nm. In this case, 4 $\text{CN}^-$  and 4 $\text{OH}^-$  ions were placed at the vicinities of the binding arms of the -NH sites of the R.

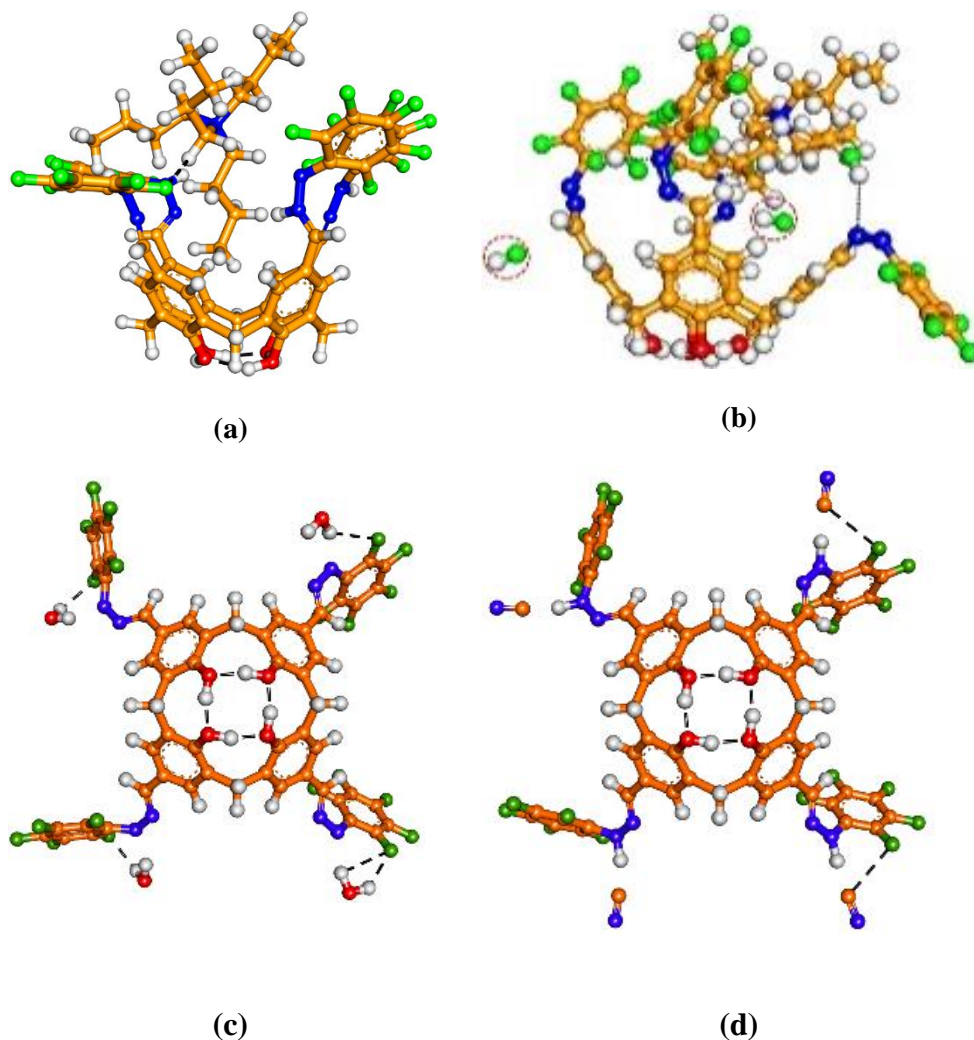

**Figure S14** Final optimized structures of (a) R+TBA (b) R +TBA+ $\text{F}^-$ . (c), (d) are the  $\text{OH}^-$  and  $\text{CN}^-$  ion addition to receptor (R).

### **S12 Gaussian reference:**

Gaussian 09, Revision A.1, Frisch, M. J.; Trucks, G. W.; Schlegel, H. B.; Scuseria, G. E.; Robb, M. A.; Cheeseman, J. R.; Scalmani, G.; Barone, V.; Mennucci, B.; Petersson, G. A.; Nakatsuji, H.; Caricato, M.; Li, X.; Hratchian, H. P.; Izmaylov, A. F.; Bloino, J.; Zheng, G.; Sonnenberg, J. L.; Hada, M.; Ehara, M.; Toyota, K.; Fukuda, R.; Hasegawa, J.; Ishida, M.; Nakajima, T.; Honda, Y.; Kitao, O.; Nakai, H.; Vreven, T.; Montgomery, Jr., J. A.; Peralta, J. E.; Ogliaro, F.; Bearpark, M.; Heyd, J. J.; Brothers, E.; Kudin, K. N.; Staroverov, V. N.; Kobayashi, R.; Normand, J.; Raghavachari, K.; Rendell, A.; Burant, J. C.; Iyengar, S. S.; Tomasi, J.; Cossi, M.;

Rega, N.; Millam, N. J.; Klene, M.; Knox, J. E.; Cross, J. B.; Bakken, V.; Adamo, C.; Jaramillo, J.; Gomperts, R.; Stratmann, R. E.; Yazyev, O.; Austin, A. J.; Cammi, R.; Pomelli, C.; Ochterski, J. W.; Martin, R. L.; Morokuma, K.; Zakrzewski, V. G.; Voth, G. A.; Salvador, P.; Dannenberg, J. J.; Dapprich, S.; Daniels, A. D.; Farkas, Ö.; Foresman, J. B.; Ortiz, J. V.; Cioslowski, J.; Fox, D. J. Gaussian, Inc., Wallingford CT, 2009.

**S13 Structural coordinates:**

**5(a) : (Receptor R)**

|   |           |           |          |   |           |           |           |
|---|-----------|-----------|----------|---|-----------|-----------|-----------|
| 6 | 3.188611  | -2.170699 | 2.747269 | 1 | 2.830483  | -0.629731 | 5.753596  |
| 6 | 2.549650  | -1.724546 | 3.907258 | 1 | 4.183027  | -0.510626 | 4.633989  |
| 6 | 1.391876  | -2.407559 | 4.334653 | 6 | -0.412658 | -4.168747 | 4.072509  |
| 6 | 0.857910  | -3.500513 | 3.621895 | 1 | -0.501601 | -4.115578 | 5.183151  |
| 6 | 1.524966  | -3.926007 | 2.469818 | 1 | -0.381103 | -5.257067 | 3.847028  |
| 6 | 2.688751  | -3.272462 | 2.032240 | 6 | -0.583279 | 2.975543  | 4.684117  |
| 1 | 4.084003  | -1.656937 | 2.399347 | 1 | -0.596191 | 4.086412  | 4.652221  |
| 1 | 1.134597  | -4.771666 | 1.897092 | 1 | -0.675044 | 2.726936  | 5.768031  |
| 6 | 3.111550  | 1.415894  | 3.062576 | 6 | -4.068049 | -0.655604 | 4.077853  |
| 6 | 2.497971  | 0.743209  | 4.121645 | 1 | -5.157352 | -0.659264 | 3.857389  |
| 6 | 1.305237  | 1.281615  | 4.650089 | 1 | -4.008004 | -0.754731 | 5.187549  |
| 6 | 0.713253  | 2.449527  | 4.129178 | 8 | 0.741334  | -2.066832 | 5.503190  |
| 6 | 1.351705  | 3.097238  | 3.067242 | 8 | 0.770554  | 0.623446  | 5.738375  |
| 6 | 2.549426  | 2.592756  | 2.536130 | 8 | -1.919691 | 0.673146  | 5.525616  |
| 1 | 4.033929  | 1.017754  | 2.640825 | 8 | -1.954946 | -2.019300 | 5.291684  |
| 1 | 0.915505  | 4.005298  | 2.644153 | 6 | 3.236545  | 3.260887  | 1.413523  |
| 6 | -3.149970 | -3.358511 | 1.536742 | 1 | 3.906059  | 2.615855  | 0.826827  |
| 6 | -3.810434 | -2.288476 | 2.167546 | 6 | -3.763199 | 3.187457  | 0.831470  |
| 6 | -3.391184 | -1.825749 | 3.416889 | 1 | -3.443498 | 4.237024  | 0.754140  |
| 6 | -2.294259 | -2.466824 | 4.029816 | 6 | -3.640359 | -3.803889 | 0.218145  |
| 6 | -1.607174 | -3.531724 | 3.414153 | 1 | -4.611603 | -3.384932 | -0.083000 |
| 6 | -2.050184 | -3.968475 | 2.162089 | 6 | 3.402257  | -3.705685 | 0.814428  |
| 1 | -4.652762 | -1.801699 | 1.674930 | 1 | 3.978596  | -2.919029 | 0.307515  |
| 1 | -1.532436 | -4.790878 | 1.660437 | 7 | -4.481870 | 2.538404  | -0.042175 |
| 6 | -2.379952 | 1.219329  | 4.344162 | 7 | 3.309643  | -4.953188 | 0.447216  |
| 6 | -3.445635 | 0.638993  | 3.627926 | 7 | -2.908468 | -4.623480 | -0.484554 |
| 6 | -3.896427 | 1.286361  | 2.473514 | 7 | 3.017112  | 4.530144  | 1.209957  |
| 6 | -3.299370 | 2.481721  | 2.041718 | 7 | -5.057948 | 3.113480  | -1.135776 |
| 6 | -2.229433 | 3.034567  | 2.768558 | 1 | -5.190574 | 2.403965  | -1.877806 |
| 6 | -1.752760 | 2.411201  | 3.923866 | 7 | -3.302037 | -5.185278 | -1.661582 |
| 1 | -4.719654 | 0.857035  | 1.897151 | 7 | 3.824142  | -5.450172 | -0.712280 |
| 1 | -1.753968 | 3.953273  | 2.423851 | 7 | 3.497820  | 5.227947  | 0.142743  |
| 6 | 3.072906  | -0.535525 | 4.668087 | 1 | 3.581690  | 6.230937  | 0.385125  |
|   |           |           |          | 6 | 4.544759  | 4.744489  | -0.723340 |
|   |           |           |          | 6 | 4.264868  | 3.749533  | -1.684942 |
|   |           |           |          | 6 | 5.846984  | 5.290993  | -0.725883 |

|   |           |           |           |   |           |                    |
|---|-----------|-----------|-----------|---|-----------|--------------------|
| 6 | 5.239846  | 3.312655  | -2.595391 |   |           |                    |
| 6 | 6.822493  | 4.880151  | -1.644443 | 6 | -2.328682 | 1.364634 3.862074  |
| 6 | 6.521804  | 3.880400  | -2.581712 | 6 | -1.686417 | 0.467424 4.723002  |
| 6 | 4.784520  | -4.750311 | -1.528522 | 6 | -0.338323 | 0.715452 5.038247  |
| 6 | 6.133618  | -5.154399 | -1.635570 | 6 | 0.375975  | 1.814284 4.530663  |
| 6 | 4.372535  | -3.670637 | -2.339598 | 6 | -0.298227 | 2.695988 3.677914  |
| 6 | 7.029269  | -4.526761 | -2.511904 | 6 | -1.642070 | 2.473443 3.341125  |
| 6 | 5.265479  | -3.018406 | -3.204175 | 1 | -3.370805 | 1.191050 3.588469  |
| 6 | 6.597037  | -3.447545 | -3.297215 | 1 | 0.224058  | 3.562529 3.264456  |
| 6 | -4.701170 | 4.419498  | -1.633298 | 6 | -2.983739 | -2.065812 3.176267 |
| 6 | -3.982361 | 4.609453  | -2.834093 | 6 | -2.209948 | -1.906724 4.315917 |
| 6 | -5.154654 | 5.578565  | -0.967158 | 6 | -1.181995 | -2.835465 4.548633 |
| 6 | -3.733936 | 5.886108  | -3.356334 | 6 | -0.947350 | -3.943164 3.717887 |
| 6 | -4.892874 | 6.863581  | -1.467634 | 6 | -1.720667 | -4.076801 2.580266 |
| 6 | -4.184980 | 7.022039  | -2.667434 | 6 | -2.714358 | -3.107545 2.235855 |
| 9 | -3.528300 | 3.550565  | -3.496908 | 1 | -3.785952 | -1.365773 2.957101 |
| 9 | -3.063354 | 6.021408  | -4.494017 | 1 | -1.572961 | -4.916570 1.900811 |
| 9 | -3.944479 | 8.234532  | -3.147601 | 6 | 3.804809  | 1.246151 1.680630  |
| 9 | -5.326854 | 7.931729  | -0.808725 | 6 | 4.253950  | -0.058546 1.944086 |
| 9 | -5.853184 | 5.468346  | 0.155966  | 6 | 3.938204  | -0.690642 3.150994 |
| 9 | 3.054337  | 3.209270  | -1.747772 | 6 | 3.169385  | 0.018783 4.091987  |
| 9 | 6.163518  | 6.226225  | 0.164152  | 6 | 2.698068  | 1.324132 3.850634  |
| 9 | 8.032063  | 5.426698  | -1.620261 | 6 | 3.030149  | 1.928491 2.635016  |
| 9 | 7.442066  | 3.476588  | -3.446784 | 1 | 4.848646  | -0.589898 1.199157 |
| 9 | 4.943787  | 2.367047  | -3.479296 | 1 | 2.672988  | 2.939264 2.414505  |
| 9 | 6.573886  | -6.162066 | -0.888646 | 6 | 2.257527  | -3.482618 3.673677 |
| 9 | 8.287099  | -4.944105 | -2.590108 | 6 | 3.409246  | -3.085101 2.836874 |
| 9 | 3.112714  | -3.255043 | -2.301753 | 6 | 3.529234  | -3.562724 1.577535 |
| 9 | 4.844936  | -1.999517 | -3.944565 | 6 | 2.560342  | -4.502018 1.007252 |
| 9 | 7.440514  | -2.839514 | -4.120218 | 6 | 1.514927  | -5.010494 1.900451 |
| 1 | -2.471745 | -5.426426 | -2.231584 | 6 | 1.347135  | -4.519982 3.148711 |
| 6 | -4.430821 | -4.726077 | -2.431742 | 1 | 4.368782  | -3.261998 0.938585 |
| 6 | -4.290373 | -4.056345 | -3.667372 | 1 | 0.835500  | -5.771559 1.496873 |
| 6 | -5.744983 | -5.024628 | -2.010618 | 6 | -2.413328 | -0.739110 5.248527 |
| 6 | -5.397457 | -3.708375 | -4.453157 | 1 | -2.082173 | -0.984052 6.282394 |
| 6 | -6.863084 | -4.661231 | -2.777353 | 1 | -3.500662 | -0.525499 5.356967 |
| 6 | -6.693146 | -4.005269 | -4.004766 | 6 | 1.829766  | 2.029120 4.856757  |
| 9 | -5.221700 | -3.088046 | -5.613741 | 1 | 2.062593  | 1.679071 5.889396  |
| 9 | -7.747250 | -3.668957 | -4.735900 | 1 | 2.065884  | 3.116841 4.878013  |
| 9 | -3.074889 | -3.746408 | -4.107146 | 6 | 0.175692  | -4.910593 4.004657 |
| 9 | -5.945605 | -5.671504 | -0.869179 | 1 | -0.153674 | -5.952407 3.794564 |
| 9 | -8.084830 | -4.949940 | -2.344494 | 1 | 0.447594  | -4.917251 5.083013 |
| 1 | 4.015327  | -6.462324 | -0.609119 | 6 | 4.387585  | -2.101998 3.419158 |
| 1 | -2.178735 | -0.320554 | 5.598580  | 1 | 5.407265  | -2.266840 3.004819 |
| 1 | -0.224525 | 0.858351  | 5.860861  | 1 | 4.501861  | -2.275120 4.515301 |
| 1 | 0.973459  | -1.107791 | 5.790201  | 8 | 0.272977  | -0.164257 5.955893 |
| 1 | -0.994892 | -2.294760 | 5.534026  | 8 | -0.348917 | -2.638885 5.725446 |
|   |           |           |           | 8 | 2.063017  | -2.954358 4.786434 |
|   |           |           |           | 8 | 2.858127  | -0.521143 5.333086 |

**5(b) : (Receptor R + 4F-)**

6 -3.369195 -3.124147 0.979304  
1 -4.223180 -2.472101 0.819886  
6 2.546277 -4.862766 -0.300460  
1 1.830937 -5.606516 -0.698245  
6 4.156940 1.859355 0.385042  
1 5.021711 1.410932 -0.125511  
6 -2.351502 3.375365 2.409003  
1 -3.014168 2.872434 1.689722  
7 3.531092 -4.411645 -1.238373  
7 -2.140293 4.656960 2.513778  
7 3.425176 2.844092 -0.058296  
7 -2.847838 -3.915462 -0.001932  
7 3.429750 -3.655409 -2.185936  
7 3.704324 3.553016 -1.183080  
7 -2.623189 5.582072 1.642700  
7 -3.207860 -4.029339 -1.194964  
6 -4.287615 -3.342295 -1.849882  
6 -4.259405 -1.962574 -2.146937  
6 -5.366671 -4.083382 -2.379649  
6 -5.241449 -1.351347 -2.939196  
6 -6.354688 -3.486672 -3.176127  
6 -6.295503 -2.114537 -3.459092  
6 -3.656083 5.299854 0.672752  
6 -4.984232 5.755389 0.815038  
6 -3.333389 4.614086 -0.517185  
6 -5.946418 5.554112 -0.183790  
6 -4.291995 4.390067 -1.518518  
6 -5.602008 4.863648 -1.356258  
6 2.240862 -2.947955 -2.619323  
6 1.653094 -1.909114 -1.871800  
6 1.709709 -3.225252 -3.893807  
6 0.580232 -1.160661 -2.374464  
6 0.625940 -2.492170 -4.403928  
6 0.057838 -1.458035 -3.644479  
9 2.139931 -1.619829 -0.670383  
9 0.058941 -0.177374 -1.651486  
9 -0.958176 -0.759429 -4.126362  
9 0.141082 -2.778181 -5.606368  
9 2.230662 -4.201361 -4.623756  
9 -3.269663 -1.210233 -1.673209  
9 -5.462050 -5.383066 -2.120072  
9 -7.353619 -4.217832 -3.659920  
9 -7.230432 -1.543380 -4.210550  
9 -5.176386 -0.048682 -3.196566  
9 -5.336988 6.398755 1.923260  
9 -7.183126 6.007327 -0.017629  
9 -2.098112 4.169981 -0.710133  
9 -3.954591 3.738079 -2.624279  
9 -6.508120 4.662919 -2.302380

6 4.645418 3.114258 -2.186508  
6 4.243895 2.600626 -3.438601  
6 6.030932 3.266116 -1.966800  
6 5.172399 2.265661 -4.433743  
6 6.972220 2.916222 -2.947908  
6 6.545334 2.418641 -4.187375  
9 4.755101 1.794063 -5.602448  
9 7.431154 2.094890 -5.119126  
9 2.949978 2.429993 -3.688568  
9 6.469274 3.753587 -0.813187  
9 8.269054 3.065732 -2.704836  
1 2.994732 -1.535476 5.336152  
1 0.615639 -3.070646 5.494147  
1 -0.051856 -1.519604 5.706207  
1 1.313262 -0.139924 5.830443  
1 5.738465 -2.634256 -2.019893  
9 5.932494 -1.977060 -1.334704  
1 -1.304027 -4.654073 -1.871441  
9 -0.345193 -4.701678 -2.065205  
1 -2.723145 6.500648 2.109250  
9 0.675294 5.827458 0.978559  
1 2.839384 3.972790 -1.568584  
9 2.088660 5.960522 0.822534

**S11(a) : ( R+ TBA)**

6 1.874476 0.641199 4.205621  
6 1.074042 -0.022544 5.140037  
6 1.281737 -1.403871 5.335397  
6 2.280748 -2.119114 4.639189  
6 3.067835 -1.426497 3.716081  
6 2.847872 -0.061173 3.481883  
1 1.734551 1.708874 4.035493  
1 3.843823 -1.955473 3.159278  
6 -1.402136 1.913837 4.125936  
6 -1.227866 0.820017 4.973718  
6 -2.191273 -0.214861 4.941864  
6 -3.288552 -0.188304 4.055858  
6 -3.416053 0.907757 3.194755  
6 -2.489294 1.958521 3.236561  
1 -0.684957 2.734610 4.150540  
1 -4.247339 0.948578 2.488954  
6 1.615420 -5.239346 1.483098  
6 0.265407 -5.588147 1.656387  
6 -0.389572 -5.312032 2.858456  
6 0.346075 -4.692543 3.892901  
6 1.697054 -4.326246 3.735677  
6 2.322472 -4.609112 2.516561  
1 -0.282382 -6.064107 0.842129

|   |           |           |           |   |           |           |           |
|---|-----------|-----------|-----------|---|-----------|-----------|-----------|
| 1 | 3.368091  | -4.334024 | 2.364914  | 6 | -3.037536 | 5.409263  | 0.640015  |
| 6 | -3.126547 | -3.483279 | 3.469440  | 6 | -1.896374 | 6.099094  | 1.097972  |
| 6 | -2.703387 | -4.484878 | 2.573139  | 6 | -4.239899 | 6.142501  | 0.553992  |
| 6 | -3.093890 | -4.379820 | 1.234240  | 6 | -1.947888 | 7.456067  | 1.452190  |
| 6 | -3.895158 | -3.310654 | 0.806916  | 6 | -4.304542 | 7.502689  | 0.888158  |
| 6 | -4.287967 | -2.312112 | 1.713946  | 6 | -3.153653 | 8.165124  | 1.344276  |
| 6 | -3.901728 | -2.378722 | 3.054839  | 6 | 4.805810  | 1.787537  | -0.017472 |
| 1 | -2.776420 | -5.137199 | 0.514873  | 6 | 5.950565  | 0.961171  | 0.107497  |
| 1 | -4.896601 | -1.475332 | 1.370868  | 6 | 5.033759  | 3.108308  | -0.469981 |
| 6 | -0.022543 | 0.708248  | 5.866415  | 6 | 7.237510  | 1.417382  | -0.203797 |
| 1 | -0.292821 | 0.182390  | 6.813966  | 6 | 6.313800  | 3.572248  | -0.804148 |
| 1 | 0.326270  | 1.710076  | 6.197975  | 6 | 7.425237  | 2.728657  | -0.667480 |
| 6 | 2.437749  | -3.602934 | 4.827656  | 6 | 4.554793  | -3.880459 | -1.966104 |
| 1 | 2.067651  | -3.912819 | 5.833851  | 6 | 5.871763  | -4.220679 | -2.359628 |
| 1 | 3.512681  | -3.887955 | 4.832937  | 6 | 4.188893  | -2.518993 | -2.074765 |
| 6 | -4.294950 | -1.306439 | 4.033771  | 6 | 6.771645  | -3.266035 | -2.850549 |
| 1 | -5.307096 | -0.912893 | 3.793137  | 6 | 5.090106  | -1.554298 | -2.549661 |
| 1 | -4.410981 | -1.746425 | 5.054226  | 6 | 6.384278  | -1.920424 | -2.941689 |
| 6 | -1.847870 | -5.631643 | 3.039893  | 6 | -5.192808 | -3.326193 | -3.371232 |
| 1 | -2.116224 | -6.563819 | 2.495973  | 6 | -5.903900 | -2.110720 | -3.305730 |
| 1 | -2.058565 | -5.869362 | 4.110627  | 6 | -5.835684 | -4.412715 | -4.003406 |
| 8 | 0.528648  | -2.136532 | 6.224959  | 6 | -7.195311 | -1.982381 | -3.840131 |
| 1 | -0.324282 | -1.636170 | 6.486224  | 6 | -7.117856 | -4.295008 | -4.558052 |
| 8 | -2.001953 | -1.225831 | 5.848757  | 6 | -7.806448 | -3.074444 | -4.472901 |
| 8 | -2.845244 | -3.550348 | 4.817910  | 9 | -5.349226 | -1.049465 | -2.730582 |
| 8 | -0.330082 | -4.495001 | 5.077533  | 9 | -7.834014 | -0.821349 | -3.752897 |
| 1 | 0.156166  | -3.830594 | 5.683040  | 9 | -9.022100 | -2.955158 | -4.985815 |
| 1 | -2.079731 | -4.205737 | 5.007413  | 9 | -7.683465 | -5.337029 | -5.153161 |
| 1 | -2.585829 | -2.046129 | 5.635822  | 9 | -5.210415 | -5.582338 | -4.081848 |
| 6 | -2.643617 | 3.151134  | 2.376642  | 9 | -0.735235 | 5.461217  | 1.202363  |
| 1 | -2.564469 | 4.110551  | 2.913588  | 9 | -5.345661 | 5.533047  | 0.139720  |
| 6 | -4.371652 | -3.232437 | -0.590685 | 9 | -5.452099 | 8.159225  | 0.782263  |
| 1 | -5.427440 | -2.944045 | -0.699703 | 9 | -3.205753 | 9.447747  | 1.669928  |
| 6 | 2.275472  | -5.549268 | 0.196775  | 9 | -0.852259 | 8.068906  | 1.882826  |
| 1 | 2.063421  | -6.550384 | -0.208326 | 9 | 5.807270  | -0.295866 | 0.519887  |
| 6 | 3.606794  | 0.629033  | 2.424720  | 9 | 8.278734  | 0.606022  | -0.069354 |
| 1 | 4.592385  | 1.027535  | 2.679664  | 9 | 4.007630  | 3.946577  | -0.586999 |
| 7 | -3.538340 | -3.519618 | -1.549118 | 9 | 6.473197  | 4.816271  | -1.239361 |
| 7 | 3.058966  | 0.735675  | 1.225845  | 9 | 8.639687  | 3.164559  | -0.973108 |
| 1 | 2.102898  | 0.308498  | 1.077908  | 9 | 2.966527  | -2.117444 | -1.742007 |
| 7 | 3.031622  | -4.632125 | -0.339537 | 9 | 4.705695  | -0.285318 | -2.641450 |
| 7 | -2.858960 | 2.989699  | 1.103761  | 9 | 7.230789  | -1.005592 | -3.395321 |
| 7 | -3.834730 | -3.394806 | -2.878021 | 9 | 7.992362  | -3.632221 | -3.217175 |
| 1 | -3.233780 | -4.037837 | -3.426343 | 9 | 6.277433  | -5.484183 | -2.266073 |
| 7 | 3.596316  | -4.874866 | -1.580528 | 7 | 0.384211  | 2.069558  | -2.499013 |
| 1 | 3.869745  | -5.844655 | -1.808980 | 6 | 1.599810  | 2.226706  | -3.435451 |
| 7 | 3.470930  | 1.336899  | 0.119753  | 1 | 1.512558  | 3.201763  | -3.970926 |
| 7 | -2.915850 | 4.031179  | 0.204904  | 1 | 2.517817  | 2.303725  | -2.799100 |
| 1 | -3.605405 | 3.788632  | -0.536580 | 6 | 1.770411  | 1.090855  | -4.448069 |

1 0.851880 0.931376 -5.045674  
 1 1.974384 0.127514 -3.936935  
 6 2.936345 1.408707 -5.401225  
 1 3.869760 1.572369 -4.824578  
 1 2.743187 2.357156 -5.941689  
 6 3.149202 0.282107 -6.406206  
 1 2.268619 0.116940 -7.037849  
 1 3.986631 0.510861 -7.080351  
 1 3.388395 -0.669171 -5.915941  
 6 -0.885797 1.960560 -3.354015  
 1 -0.909445 0.944022 -3.814095  
 1 -0.803812 2.687009 -4.198174  
 6 -2.195401 2.214318 -2.603387  
 1 -2.226706 3.249509 -2.208082  
 1 -2.283060 1.544159 -1.714174  
 6 -3.398637 1.988335 -3.531348  
 1 -3.447521 0.923571 -3.838545  
 1 -3.281960 2.569036 -4.468527  
 6 -4.703559 2.384805 -2.847841  
 1 -4.764467 3.463177 -2.665305  
 1 -5.568260 2.123767 -3.475466  
 1 -4.843268 1.866642 -1.891459  
 6 0.602257 0.790302 -1.674615  
 1 1.672487 0.784409 -1.335202  
 1 0.492105 -0.087477 -2.354271  
 6 -0.319285 0.616099 -0.465844  
 1 -1.392830 0.617154 -0.773749  
 1 -0.226365 1.460364 0.247410  
 6 0.001896 -0.704840 0.251420  
 1 -0.199594 -1.565949 -0.421256  
 1 1.088070 -0.763855 0.487941  
 6 -0.808669 -0.861607 1.530730  
 1 -1.890459 -0.866533 1.334657  
 1 -0.580196 -1.814741 2.028410  
 1 -0.618359 -0.060572 2.255288  
 6 0.348078 3.288957 -1.564980  
 1 1.291565 3.291424 -0.965422  
 1 -0.476305 3.144425 -0.821109  
 6 0.151593 4.630499 -2.279263  
 1 -0.620926 5.211638 -1.726726  
 1 -0.276263 4.505707 -3.293285  
 6 1.435841 5.468900 -2.355789  
 1 2.255329 4.894164 -2.828877  
 1 1.790680 5.709026 -1.331544  
 6 1.207758 6.764084 -3.128088  
 1 2.125907 7.367429 -3.162778  
 1 0.904645 6.584460 -4.165496  
 1 0.437247 7.391248 -2.663248

**S11(b): (R +TBA+F<sup>-</sup>)**

6 -0.734856 -0.535526 4.064426  
 6 -1.591795 -1.609908 4.316646  
 6 -1.048769 -2.904116 4.348545  
 6 0.320993 -3.150258 4.148979  
 6 1.152893 -2.058713 3.898063  
 6 0.638377 -0.744127 3.833811  
 1 -1.125003 0.481500 4.061701  
 1 2.218506 -2.217073 3.740322  
 6 -3.954701 0.139080 2.759463  
 6 -3.737425 -1.117990 3.208804  
 6 -4.097152 -2.275840 2.371368  
 6 -4.663410 -2.025242 1.029882  
 6 -4.869676 -0.754897 0.611251  
 6 -4.557798 0.402847 1.450012  
 1 -3.672253 1.008840 3.366532  
 1 -5.268140 -0.558776 -0.390760  
 6 2.175249 -5.524204 0.724220  
 6 1.052865 -6.175946 0.167161  
 6 -0.138304 -6.265499 0.880656  
 6 -0.185018 -5.729427 2.190607  
 6 0.946437 -5.119063 2.788024  
 6 2.115247 -5.010810 2.036426  
 1 1.099470 -6.576159 -0.851590  
 1 2.989570 -4.524975 2.475282  
 6 -3.130200 -4.923601 0.118255  
 6 -2.027341 -5.578569 -0.452823  
 6 -1.466759 -5.023079 -1.588173  
 6 -1.942953 -3.790625 -2.130335  
 6 -3.144138 -3.242112 -1.583078  
 6 -3.736494 -3.795722 -0.457051  
 1 -0.619017 -5.502390 -2.080360  
 1 -3.573739 -2.362012 -2.054345  
 6 -3.067038 -1.387871 4.526874  
 1 -3.535897 -2.267904 5.027692  
 1 -3.224969 -0.547531 5.240091  
 6 0.867712 -4.553202 4.179030  
 1 0.239562 -5.201848 4.835323  
 1 1.865896 -4.565075 4.670761  
 6 -4.982068 -3.203291 0.154128  
 1 -5.685647 -2.914770 -0.662201  
 1 -5.549493 -3.972198 0.727815  
 6 -1.387430 -6.770714 0.214861  
 1 -1.164476 -7.562932 -0.534277  
 1 -2.066311 -7.267285 0.941600  
 8 -1.850089 -4.023456 4.629792  
 1 -2.816785 -3.814171 4.414609

|   |            |           |           |   |            |           |           |
|---|------------|-----------|-----------|---|------------|-----------|-----------|
| 8 | -3.923290  | -3.435202 | 2.819181  | 9 | -0.934696  | -0.948760 | -8.083913 |
| 8 | -3.676862  | -5.470064 | 1.356158  | 9 | -0.918394  | -2.930495 | -6.251307 |
| 8 | -1.377933  | -5.843667 | 2.841054  | 9 | -7.317733  | 3.542477  | 1.524813  |
| 1 | -1.412531  | -5.259497 | 3.733396  | 9 | -7.966698  | 0.347170  | -1.891286 |
| 1 | -2.821920  | -5.690019 | 1.965913  | 9 | -10.543737 | 0.029907  | -1.111343 |
| 1 | -4.073213  | -4.566988 | 1.948976  | 9 | -11.528708 | 1.481847  | 0.986976  |
| 6 | -4.771351  | 1.686807  | 1.064097  | 9 | -9.898749  | 3.239427  | 2.307515  |
| 1 | -4.484871  | 2.544116  | 1.704371  | 9 | 3.951186   | 0.585021  | 1.707751  |
| 6 | -1.207383  | -3.093687 | -3.125891 | 9 | 6.555552   | 1.117968  | 2.057361  |
| 1 | -1.677303  | -2.268412 | -3.652314 | 9 | 2.837293   | 4.617864  | 3.948506  |
| 6 | 3.336963   | -5.381402 | -0.138749 | 9 | 5.457451   | 5.171418  | 4.223846  |
| 1 | 3.438508   | -6.080067 | -1.012723 | 9 | 7.352309   | 3.426691  | 3.298978  |
| 6 | 1.559561   | 0.345203  | 3.543395  | 9 | 3.265798   | -1.841962 | -0.721078 |
| 1 | 2.568342   | 0.216186  | 3.942580  | 9 | 4.076066   | 0.620026  | -1.534997 |
| 7 | 0.081351   | -3.483447 | -3.331978 | 9 | 6.718758   | 1.284241  | -1.440708 |
| 7 | 1.169190   | 1.406246  | 2.842483  | 9 | 8.555246   | -0.517872 | -0.517790 |
| 7 | 4.225830   | -4.456224 | -0.028549 | 9 | 7.754757   | -2.973934 | 0.284385  |
| 7 | -5.181682  | 2.083995  | -0.241868 | 7 | 1.184615   | 4.624259  | -0.429965 |
| 7 | 0.961683   | -2.973771 | -4.065199 | 6 | 2.526782   | 5.038096  | 0.202112  |
| 7 | 5.205969   | -3.809215 | 0.255986  | 1 | 2.413244   | 6.059890  | 0.651020  |
| 7 | 1.887015   | 2.435701  | 2.533960  | 1 | 2.717047   | 4.354640  | 1.069147  |
| 7 | -6.264031  | 2.216638  | -0.774388 | 6 | 3.718630   | 5.011694  | -0.756737 |
| 6 | -7.574015  | 1.962545  | -0.210577 | 1 | 3.643015   | 5.819837  | -1.511489 |
| 6 | -8.099929  | 2.688090  | 0.876117  | 1 | 3.755529   | 4.060991  | -1.327461 |
| 6 | -8.430555  | 1.063900  | -0.877041 | 6 | 5.031237   | 5.179513  | 0.027631  |
| 6 | -9.432650  | 2.536204  | 1.283407  | 1 | 5.170309   | 4.327174  | 0.723736  |
| 6 | -9.763394  | 0.891923  | -0.471664 | 1 | 4.985306   | 6.086069  | 0.665034  |
| 6 | -10.270510 | 1.634139  | 0.606689  | 6 | 6.228899   | 5.277503  | -0.910790 |
| 6 | 3.268686   | 2.577602  | 2.812969  | 1 | 6.172961   | 6.159272  | -1.560427 |
| 6 | 4.285852   | 1.706283  | 2.347668  | 1 | 7.166035   | 5.360033  | -0.342873 |
| 6 | 3.726465   | 3.756741  | 3.459497  | 1 | 6.322376   | 4.398011  | -1.557525 |
| 6 | 5.649335   | 1.978768  | 2.513341  | 6 | 0.953084   | 5.488999  | -1.673132 |
| 6 | 5.084966   | 4.049857  | 3.618249  | 1 | 1.709040   | 5.202655  | -2.442002 |
| 6 | 6.060896   | 3.157422  | 3.146164  | 1 | 1.168305   | 6.549592  | -1.394462 |
| 6 | 5.484004   | -2.493453 | -0.215162 | 6 | -0.441884  | 5.409251  | -2.299933 |
| 6 | 6.852790   | -2.114204 | -0.155178 | 1 | -1.242545  | 5.538718  | -1.546342 |
| 6 | 4.551100   | -1.535779 | -0.689343 | 1 | -0.612979  | 4.403075  | -2.748782 |
| 6 | 7.269032   | -0.843382 | -0.572855 | 6 | -0.589415  | 6.481756  | -3.391957 |
| 6 | 4.966206   | -0.263228 | -1.098704 | 1 | 0.208576   | 6.366281  | -4.153197 |
| 6 | 6.327855   | 0.086254  | -1.046494 | 1 | -0.454485  | 7.492793  | -2.958418 |
| 6 | 0.812049   | -1.898187 | -5.002461 | 6 | -1.952868  | 6.394889  | -4.069422 |
| 6 | 1.698965   | -0.801693 | -4.925183 | 1 | -2.776378  | 6.533380  | -3.358954 |
| 6 | -0.073712  | -1.915300 | -6.103257 | 1 | -2.059341  | 7.166159  | -4.843312 |
| 6 | 1.701288   | 0.224934  | -5.878998 | 1 | -2.106798  | 5.425304  | -4.559607 |
| 6 | -0.083028  | -0.895921 | -7.066327 | 6 | 1.289675   | 3.129565  | -0.780171 |
| 6 | 0.804891   | 0.183800  | -6.955644 | 1 | 1.607961   | 2.588055  | 0.154934  |
| 9 | 2.565580   | -0.725916 | -3.917547 | 1 | 2.112710   | 2.998296  | -1.518061 |
| 9 | 2.547896   | 1.243332  | -5.758043 | 6 | 0.004651   | 2.490654  | -1.309262 |
| 9 | 0.797135   | 1.156928  | -7.858954 | 1 | -0.223494  | 2.848928  | -2.338236 |

|   |           |           |           |   |           |           |           |
|---|-----------|-----------|-----------|---|-----------|-----------|-----------|
| 1 | -0.871701 | 2.781780  | -0.689712 | 1 | 1.660713  | 6.802274  | 1.880764  |
| 6 | 0.134644  | 0.959525  | -1.308478 | 1 | 0.485629  | 6.158074  | 3.039009  |
| 1 | 0.990040  | 0.647260  | -1.939224 | 6 | 0.155091  | 8.232239  | 2.504677  |
| 1 | 0.361289  | 0.597944  | -0.283491 | 1 | 0.759037  | 8.626502  | 3.333368  |
| 6 | -1.141946 | 0.295441  | -1.813461 | 1 | 0.270618  | 8.925669  | 1.664157  |
| 1 | -1.382989 | 0.598221  | -2.838701 | 1 | -0.892339 | 8.278158  | 2.827032  |
| 1 | -1.034051 | -0.800564 | -1.819708 | 1 | 2.646925  | -3.754589 | -3.457515 |
| 1 | -2.003268 | 0.535729  | -1.181778 | 9 | 3.389339  | -4.079014 | -2.893383 |
| 6 | 0.087624  | 4.802220  | 0.631418  | 1 | -4.200505 | 3.012479  | -2.423479 |
| 1 | 0.405630  | 4.234404  | 1.551005  | 9 | -3.384004 | 3.532475  | -2.434457 |
| 1 | -0.829883 | 4.276495  | 0.265177  | 1 | 5.741290  | -7.544944 | 2.247186  |
| 6 | -0.255934 | 6.248471  | 0.990133  | 9 | 5.160159  | -6.936782 | 1.767440  |
| 1 | -1.330327 | 6.279665  | 1.281256  | 1 | -0.561112 | 1.775429  | 2.214318  |
| 1 | -0.188887 | 6.922804  | 0.113772  | 9 | -1.473079 | 2.039894  | 1.933347  |
| 6 | 0.580315  | 6.812670  | 2.147202  |   |           |           |           |
